# Supplementary material for: YFO photocathode fabricated via spray pyrolysis for unassisted solar water splitting for generation of hydrogen fuel
Source: Royal Society of Chemistry journal article supplement (doi:10.1039/d4se01276c), 2024-11-26
Supplement: d4se01276c1.pdf [file d4se01276c1.pdf]

## Supplementary information (SI)

### **YFO photocathode fabricated by spray pyrolysis for unassisted solar water splitting for generation of hydrogen fuel**

Bandar Y Alfaifi<sup>1</sup> Hameed Ullah<sup>2\*</sup>, Xin Jiang<sup>2\*</sup>, Asif Ali Tahir<sup>1</sup>

<sup>1</sup>Solar Energy Research Group, Environment and Sustainability Institute, Department of Engineering, University of Exeter, Penryn Campus, Cornwall, United Kingdom

<sup>2</sup>Chair of Surface and Materials Technology, Institute of Materials Engineering, University of Siegen, Siegen, Germany

\*Corresponding author: [hameed.ullah@uni-siegen.de](mailto:hameed.ullah@uni-siegen.de); [xin.jiang@uni-siegen.de](mailto:xin.jiang@uni-siegen.de)

**Table S1.** Crystal structure parameters of the samples YFO-500, YFO-550, YFO-600 and YFO-650.

| Sample  | Crystallite size (nm) | Lattice strain ( $10^{-3}$ ) | Interplanar spacing ( $d_{121}$ ) (nm) |
|---------|-----------------------|------------------------------|----------------------------------------|
| YFO-500 | ---                   | ---                          | ---                                    |
| YFO-550 | 35.94                 | 1.76                         | 2.6952                                 |
| YFO-600 | 49.41                 | 1.28                         | 2.7003                                 |
| YFO-650 | 49.18                 | 1.31                         | 2.6964                                 |

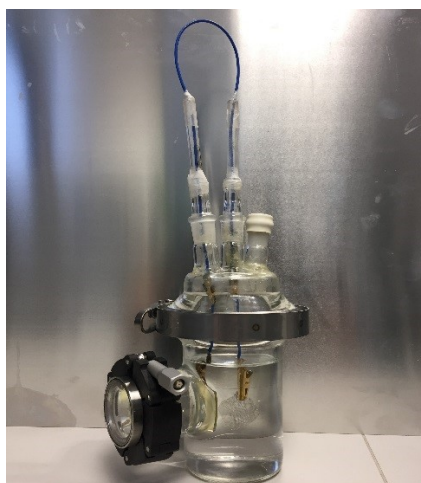

**Figure S1.** Custom-made reactor vessel for hydrogen evolution test with a fused silica quartz viewport. The *o*-YFO working electrode and Pt mesh counter electrode are connected by a single outer wire

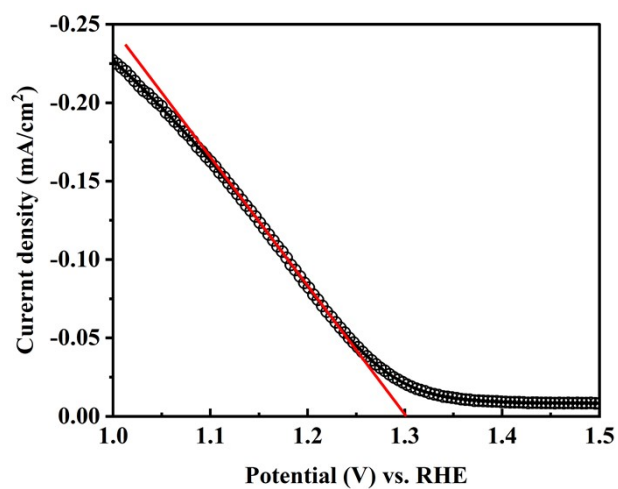

**Figure S2.** Current density plot as a function of potential vs. RHE for determination of the onset potential of YFO-600

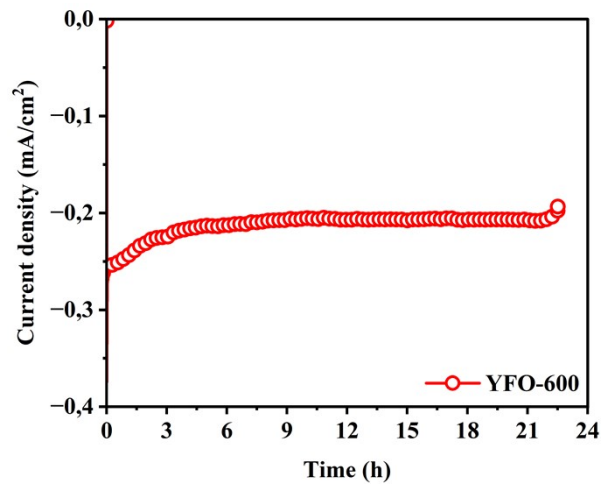

**Figure S3.** Chronoamperometric curve of YFeO<sub>3</sub> film with illumination for 24 hours at -0.3 V vs. Ag/AgCl.

#### Equation for Faradaic efficiency determination

$$\text{Faradaic efficiency} = \frac{H_2(\text{exp.})}{H_2(\text{theo.})} = \frac{H_2(\text{exp.})}{H_2(\text{photo})} = \frac{H_2(\text{exp.})}{\left( \frac{J_{\text{photo}} \times A \times t}{e} / 4 \right) / N_A} \times 100\% \quad (\text{S1})$$

Where  $H_2(\text{exp.})$  and  $H_2(\text{theo.})$  are the amounts of hydrogen, respectively, measured experimental by GC and determined theoretically from  $i$ - $t$  curve.  $J_{\text{photo}}$  (A/cm<sup>2</sup>) is the photocurrent density,  $t$  (seconds) is the measurement time,  $A$  (cm<sup>2</sup>) is the area of the photoelectrode illuminated,  $e$  ( $1.602 \times 10^{-19}$  C) is the charge of an photogenerated electron and  $N_A$  ( $6.02 \times 10^{23}$  mol<sup>-1</sup>) is the Avogadro constant.
